# Supplementary material
Source: Springer Nature journal article supplement (https://www.springermedizin.de/resource/supplementary/13054_2010_9361_MOESM4_ESM.pdf/9706056)
Supplement: MOESM4 [file 9706056]

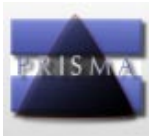

Identification

Records identified through database searching  
MEDLINE , EMBASE, Cochrane Library,  
National Guidelines Clearing House, National  
Library for Health Guidelines Finder, National  
Blood Service Systematic Review Initiative,  
Cochrane Injuries Group register  
11,856

Screening

Records screened: 11,848

Duplicates removed: 8

Excluded  
No apparent relevance  
on initial screening:  
11,728

Eligibility

Full-text articles assessed for  
eligibility: 120

Full-text articles excluded:  
Not trauma patients: 5  
No transfusion/coagulation: 21  
Not randomized: 18  
No immediate management: 8  
Not RCT (review, abstract): 15  
Cohort studies: 3  
No comparator intervention: 1

Included

Studies included in qualitative  
synthesis: 35

Other relevant studies:  
Trial still in progress: 4  
Trial terminated: 3  
Substudy: 5

Studies included in quantitative  
synthesis (meta-analysis): 0
